# Supplementary material for: Enhanced secondary organic aerosol formation from the photo-oxidation of mixed anthropogenic volatile organic compounds
Source: Copernicus journal article supplement (doi:10.5194/acp-2020-1189), 2020-11-26
Supplement: Supplementary file 1 [file acp-2020-1189-supplement.pdf]

*Supporting of*

***Enhanced secondary organic aerosol formation from the photo-oxidation of mixed anthropogenic volatile organic compounds***

Junling Li et al.

5 *Correspondence to Hong Li (lihong@craes.org.cn)*

10

15

20

25

## Calculation of Vapor Wall Loss

$$\bar{c} = \sqrt{\frac{8RT}{\pi M_w}} \quad (1)$$

30 where  $R$  was the ideal gas constant (i.e.,  $8.314 \text{ J mol}^{-1} \text{ K}^{-1}$ ),  $T$  was the temperature,  $M_w$  was the molecular weight.

$$D_{gas} = D_{CO_2} \times \frac{M_w CO_2}{M_w} \quad (2)$$

where  $D_{CO_2}$  was  $1.38 \times 10^{-5} \text{ m}^2 \text{ s}^{-1}$ ,  $M_w$  was set to  $300 \text{ g mol}^{-1}$  here.

$$k_n = \frac{\lambda}{R_p} = \frac{6D_{gas}}{D_p \bar{c}} \quad (3)$$

where  $K_n$  was the Knudsen number,  $R_p$  was the particle radius, and  $\lambda$  was the gas mean free path.

$$35 \bar{F}_{FS} = \frac{0.75\alpha(1+k_n)}{k_n^2+k_n+0.283k_n\alpha+0.75\alpha} \quad (4)$$

where  $\alpha$  was the mass accommodation coefficient onto particles, and it was set to 0.002 in this work (Zhang et al., 2014).

**Table S1.**  $\bar{\tau}_{g-p}/\tau_{g-w}$  values for the VOCs used in this work.

| VOC                | AS Seed (Yes or No) | Temperature (°C) | $\bar{\tau}_{g-p}/\tau_{g-w}$ |
|--------------------|---------------------|------------------|-------------------------------|
| 1,3,5-TMB          | No                  | 35               | 2.64-4.42                     |
| <i>n</i> -dodecane | No                  | 35               | 4.25-7.34                     |
| Mix                | No                  | 35               | 0.19-0.85                     |

40 **Table S2.** Initial concentrations of the conducted experiments.

| Date                       | Precursor          | Concentration (ppb) | TMB/Dode | NO <sub>x</sub> (ppb) | $\Delta\text{VOCs}/\text{NO}_x$ |
|----------------------------|--------------------|---------------------|----------|-----------------------|---------------------------------|
| 2019.0927                  | <i>n</i> -dodecane | 22                  | --       | 210                   | 1.26                            |
| 2019.1009                  | <i>n</i> -dodecane | 20                  | --       | 214                   | 1.12                            |
| 2019.0925(Li et al., 2021) | 1.3.5-TMB          | 178                 | --       | 197                   | 8.13                            |
| 2019.1014(Li et al., 2021) | 1.3.5-TMB          | 170                 | --       | 250                   | 6.12                            |
| 2019.0903(Li et al., 2021) | 1.3.5-TMB          | 105                 | --       | 211                   | 4.48                            |
| 2019.0907                  | Dod+TMB            | 28+168              | 6        | 231                   | 8                               |
| 2019.0921                  | Dod+TMB            | 22+155              | 7        | 212                   | 7.83                            |
| 2019.0919                  | Dod+TMB            | 20+182              | 9.1      | 218                   | 8.61                            |

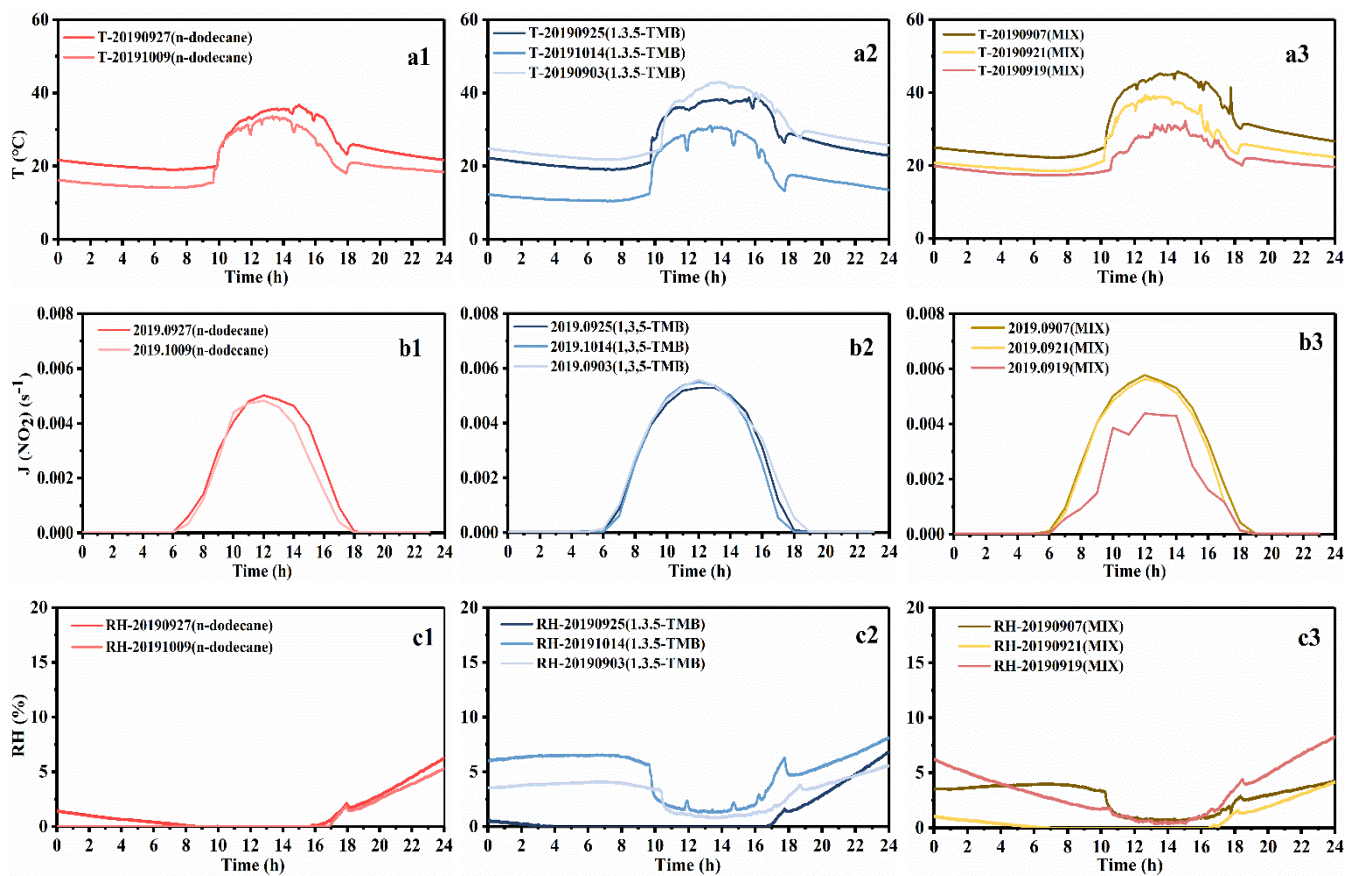

45

Figure S1. The temperature (T, a), the NO<sub>2</sub> photolysis rate of the experiments (J(NO<sub>2</sub>), b), and relative humidity (RH, c); the data of 1,3,5-TMB was referred to Li et al. (2021)) in summer.

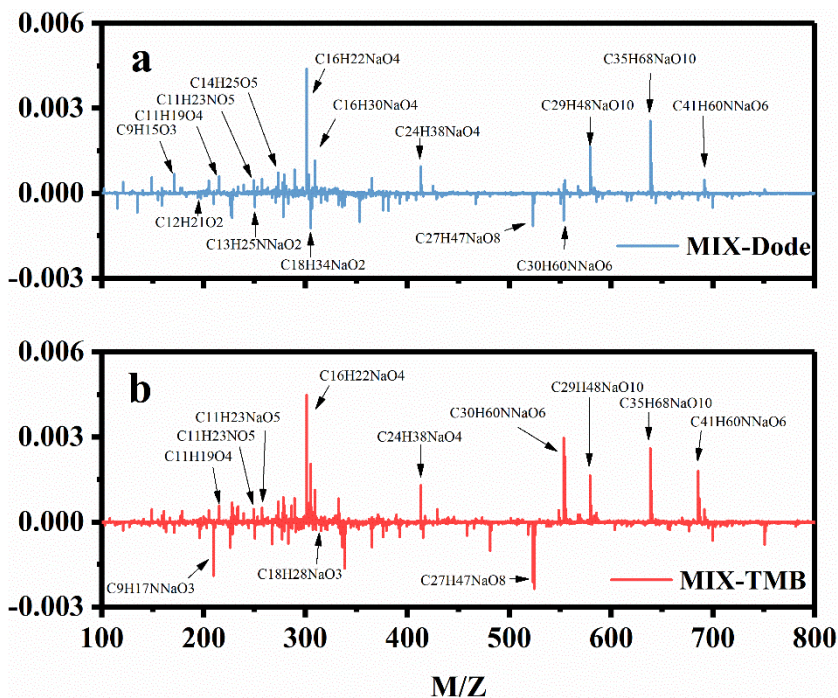

Figure S2. Results of mass spectra difference in (a) mixed AVOCs SOA minus *n*-dodecane SOA, and (b) mixed AVOCs SOA minus 1,3,5-TMB SOA. The Y-axis is the relative intensity normalized by dividing by the total signal strength of the mass spectra.

## References

- Li, J., Li, H., Wang, X., Wang, W., Ge, M., Zhang, H., Zhang, X., Li, K., Chen, Y., Wu, Z., Chai, F., Meng, F., Mu, Y., Mellouki, A., Bi, F., Zhang, Y., Wu, L., and Liu, Yongchun: A Large-Scale Outdoor Atmospheric Simulation Smog Chamber for Studying Atmospheric Photochemical Processes: Characterization and Preliminary Application, *J. Environ. Sci.* 102, 185-197, 2021.
- Zhang, X., Cappa, C. D., Jathar, S. H., McVay, R. C., Ensberg, J. J., Kleeman, M. J., and Seinfeld, J. H.: Influence of vapor wall loss in laboratory chambers on yields of secondary organic aerosol, *Proc. Natl. Acad. Sci. USA* 111, 5802-5807, 2014.
